# Supplementary material for: Extrinsic and intrinsic strength of amorphous olivine films
Source: Copernicus journal article supplement (doi:10.5194/ejm-37-91-2025), 2025-02-25
Supplement: Supplementary file 1 [file ejm-37-91-2025-supplement.pdf]

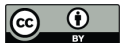

*Supplement of*

## **Extrinsic and intrinsic strength of amorphous olivine films**

**Jens Jarnot et al.**

*Correspondence to:* Patrick Cordier ([patrick.cordier@univ-lille.fr](mailto:patrick.cordier@univ-lille.fr)) and Oleksandr Glushko ([oleksandr.glushko@unileoben.ac.at](mailto:oleksandr.glushko@unileoben.ac.at))

The copyright of individual parts of the supplement might differ from the article licence.

Table S1. Overview of the tested sample and applied straining steps.

|                | Olivine-01-01                  | Olivine-01-02                  | Olivine-01-03                  | Olivine-03-00                  | Olivine-03-01                  | Olivine-03-02                  |
|----------------|--------------------------------|--------------------------------|--------------------------------|--------------------------------|--------------------------------|--------------------------------|
| Straining step | $\epsilon_{\text{Global}}$ [%] |
| 0              | 0.00                           | 0.00                           | 0.00                           | 0.00                           | 0.00                           | 0.00                           |
| 1              | 1.1                            | 1.54                           | 0.22                           | 0.19                           | 0.24                           | 0.22                           |
| 2              | 2.2                            | 2.93                           | 0.56                           | 0.47                           | 0.55                           | 0.52                           |
| 3              | 2.8                            | 4.43                           | 0.78                           | 0.89                           | 0.91                           | 0.83                           |
| 4              | 3.7                            | 5.46                           | 1.03                           | 1.45                           | 1.49                           | 1.51                           |
| 5              | 4.8                            | 6.54                           | 1.22                           | 1.96                           | 2.01                           | 1.94                           |
| 6              | 5.9                            | 7.43                           | 1.40                           | 2.47                           | 2.68                           | 2.41                           |
| 7              | 7                              | 8.82                           | 2.37                           | 2.91                           | 2.96                           | 3.02                           |
| 8              | 7.9                            | 10.14                          | 3.59                           | 3.45                           | 3.47                           | 3.52                           |
| 9              | 8.8                            | 11.00                          | 4.86                           | 3.89                           | 3.90                           | 4.10                           |
| 10             | 9.6                            | 11.96                          | 6.17                           | 4.40                           | 4.57                           | 4.47                           |
| 11             | 10.5                           | 13.07                          | 7.48                           | 5.00                           | 5.00                           | 4.94                           |
| 12             |                                |                                | 8.67                           | 5.95                           | 5.91                           | 5.98                           |

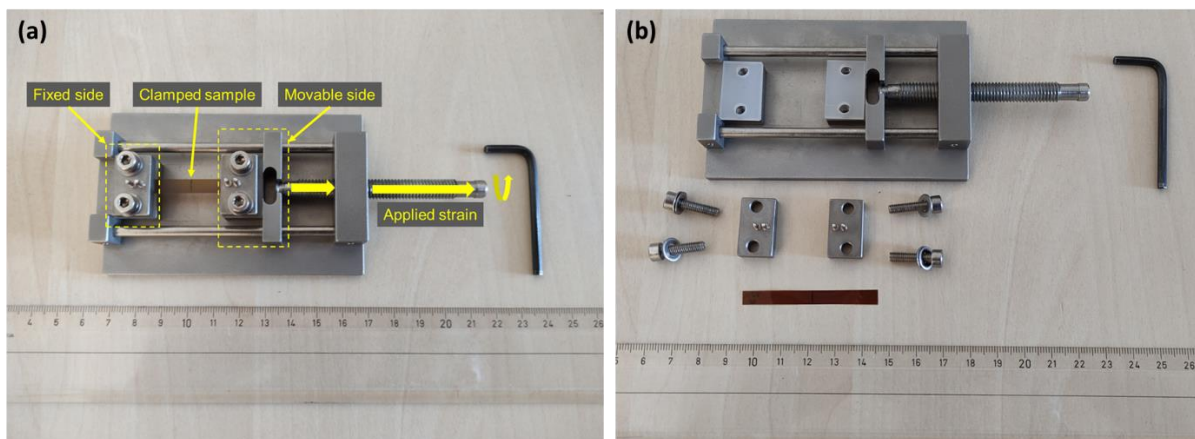

Figure S1. Additional details to the straining device used for experiments. The mounted sample which is fixed and pre-strained is shown in (a). De-mounted sample along with the removed gripping plates and screws is shown in (b).
